# Supplementary material
Source: publisher figshare collection journal article supplement (https://acs.figshare.com/ndownloader/files/5086762)
Supplement: Supplementary file 1 [file 5086762]

# Supporting Information

For

## Spectrophotometric Study of Fluorescence Sensing and Selective Binding of Biochemical Substrates by 2,2'-Bridged Bis( $\beta$ -cyclodextrin) and Its Water-Soluble Fullerene Conjugate

*Yu Liu,\* Peng Liang, Yong Chen, Yan-Li Zhao, Fei Ding and Ao Yu*

**Equations to calculate the  $K_s$  values for the 1:2 inclusion complexation between host and guest.**

After validating the 1:2 complexation stoichiometry between host and guest by the continuous variation method, the inclusion complexation of two guest molecules with a host molecule is expressed by eq 1, and the complex stability constant ( $K_s$ ) is expressed by eq 2.

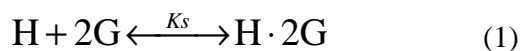

$$K_s = \frac{[H \cdot 2G]}{[H][G]^2} \quad (2)$$

where  $[H]$ ,  $[G]$ , and  $[H \cdot 2G]$  represent the equilibrium concentration of the host, the guest, and the formed complex, respectively.

The fluorescence intensity ( $F$ ) is proportional to the concentration of the fluorophore ( $c$ ) in dilute solution (eq 3),

$$F = \epsilon_F c \quad (3)$$

From eq 3, we can obtain the following equations. (In this case, the host is nonfluorescent)

$$F_0 = \epsilon_F [G]_0 \quad (4)$$

$$F = \epsilon_F [G] + \epsilon_F' [H \cdot 2G] = \epsilon_F ([G]_0 - 2[H \cdot 2G]) + \epsilon_F' [H \cdot 2G] = \epsilon_F [G]_0 + (\epsilon_F' - 2\epsilon_F) [H \cdot 2G] \quad (5)$$

where  $[G]_0$  signifies the initial concentration of the guest,  $\epsilon_F$  and  $\epsilon_F'$  represent the molar fluorescence intensity of the free guest and the complex.

Subtracting eq 4 from eq 5, we obtain,

$$\Delta F = F - F_0 = (\epsilon_F' - 2\epsilon_F) [H \cdot 2G] = \Delta\epsilon_F [H \cdot 2G] \quad (6)$$

where  $\Delta F$  and  $\Delta\epsilon_F$  denote the changes in the fluorescence intensity and molar fluorescence intensity of guest molecule upon complexation with host compounds.

We also have the following equations,

$$[H] = [H]_0 - [H \cdot 2G] \quad (7)$$

$$[G] = [G]_0 - 2[H \cdot 2G] \quad (8)$$

By combining eqs 2, 6, 7 and 8, and neglecting the terms of  $[H \cdot 2G]^2$  and  $[H \cdot 2G]^3$  by similar ways to Tamaki's<sup>1</sup> and Bender's<sup>2</sup> treatments for spectral changes on complex formation, we can obtain eq 9,

$$\frac{[H]_0 [G]_0^2}{\Delta F} = \frac{1}{\Delta\epsilon_F Ks} + \frac{[G]_0 ([G]_0 + 4[H]_0)}{\Delta\epsilon_F} \quad (9)$$

Using the approximate linear plot  $\frac{[H]_0 [G]_0^2}{\Delta F}$  vs  $[G]_0 ([G]_0 + 4[H]_0)$ , the complex stability constant ( $Ks$ ) of two guest molecules with a host molecule is obtained.

---

<sup>1</sup> Tamaki, T.; Kokubu, T.; Ichimura, K. *Tetrahedron* **1987**, 43, 1485-1494.

<sup>2</sup> VanEtten, R. L.; Sebastian, J. F.; Clowes, G. A.; Bender, M. L. *J. Am. Chem. Soc.*

---

**1967**, 89, 3242-3253.
